# Supplementary material for: Loss of Calreticulin Uncovers a Critical Role for Calcium in Regulating Cellular Lipid Homeostasis
Source: PubMed Central journal article supplement (PMC5517566; doi:10.1038/s41598-017-05734-x), 2017-07-19
Supplement: 41598_2017_5734_MOESM1_ESM.pdf [file 41598_2017_5734_MOESM1_ESM.pdf]

## SUPPLEMENTARY MATERIAL

Loss of Calreticulin Uncovers a Critical Role for Calcium in Regulating Cellular Lipid Homeostasis

Wen-An Wang<sup>1</sup>, Wen-Xin Liu<sup>1</sup>, Serpen Durnaoglu<sup>2</sup>, Sun-Kyung Lee<sup>2</sup>, Jihong Lian<sup>3</sup>, Richard Lehner<sup>3</sup>, Joohong Ahn<sup>2</sup>, Luis B. Agellon<sup>4</sup> and Marek Michalak<sup>1</sup>

From the <sup>1</sup>Department of Biochemistry, University of Alberta, Edmonton, Alberta, Canada T6G 2H7; <sup>2</sup>Department of Life Sciences, Research Institute for Natural Sciences, BK21 Plus Life Science for BDR Team, Research Institute of Natural Science, Hanyang University, Seoul 133-791, South Korea; <sup>3</sup>Department of Cell Biology, University of Alberta, Edmonton, Alberta, T6G 2H7, Canada and <sup>4</sup>School of Dietetics and Human Nutrition, McGill University, Ste. Anne de Bellevue, Quebec, H9X 3V9, Canada

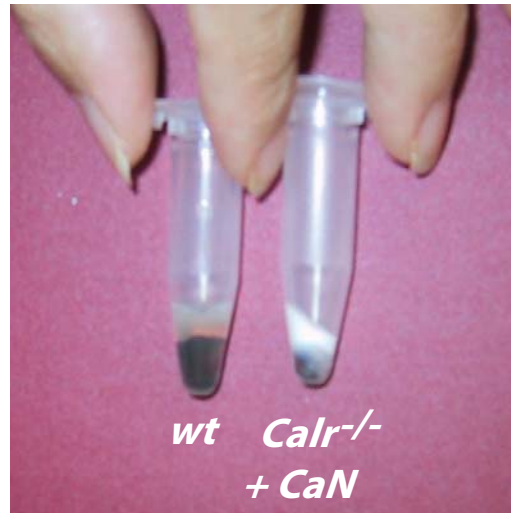

**Supplementary Figure S1.** Serum from wild-type (*wt*) and calreticulin-deficient (*Calr*<sup>-/-</sup>) mouse rescued by cardiac-specific expression of the activated calcineurin (*Calr*<sup>-/-</sup>+CaN)<sup>12</sup>.

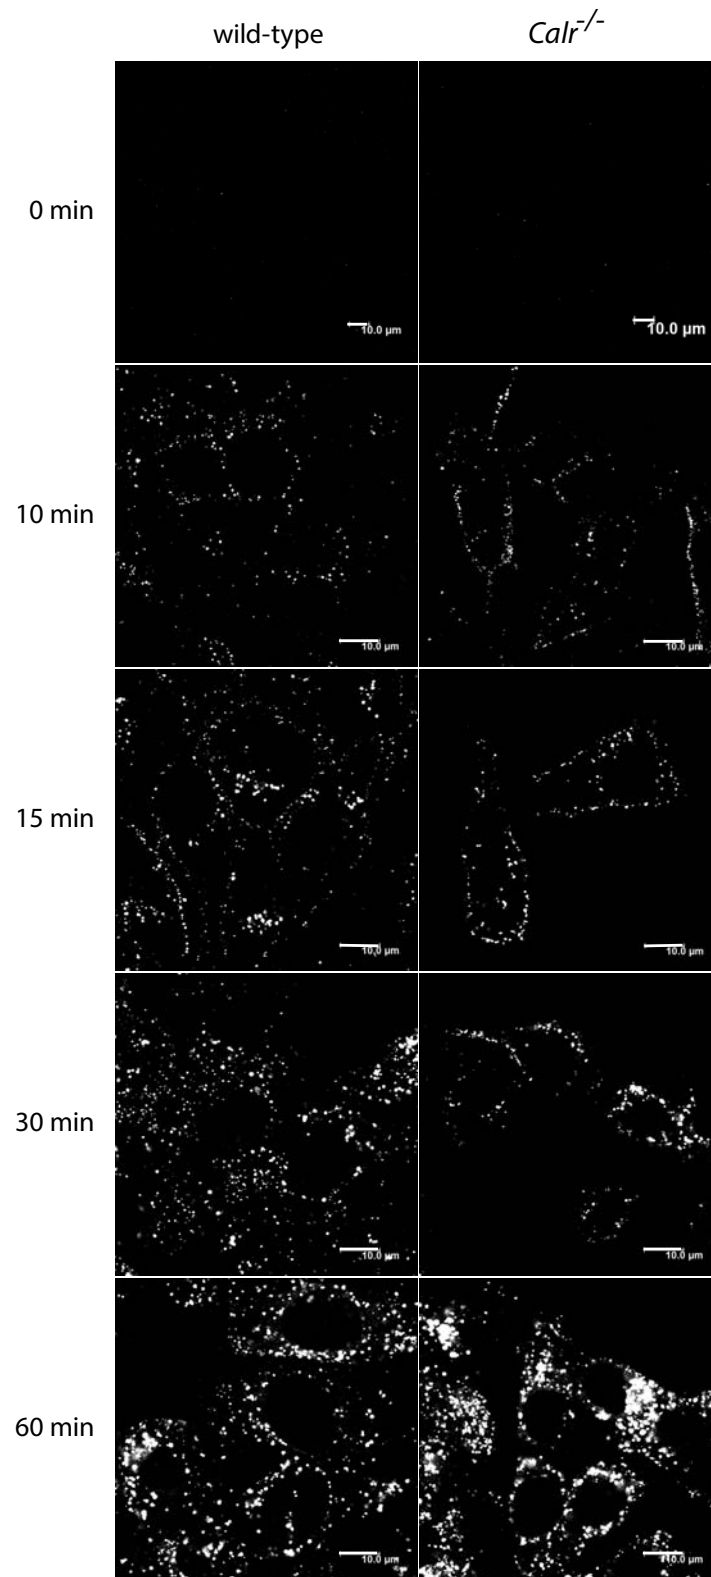

**Supplementary Figure S2. Uptake of fluorescent LDL in wild-type and *Calr*<sup>-/-</sup> cells.** The time of incubation with LDL fluorescent complex with BODIPY as indicate in the Figure.

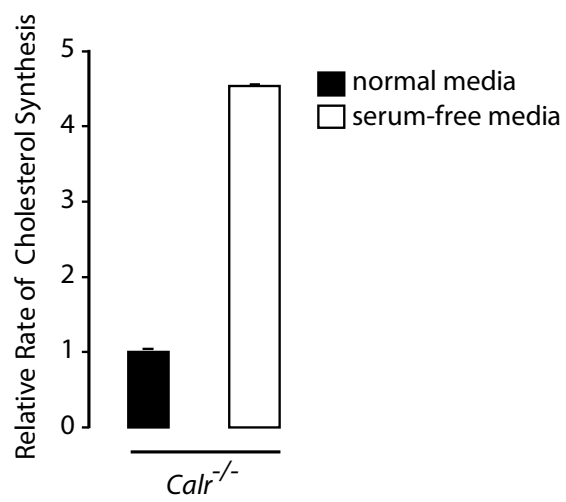

**Supplementary Figure S3. Rate of cholesterol synthesis in *Calr*<sup>-/-</sup> cells cultured with normal and serum-free media.**

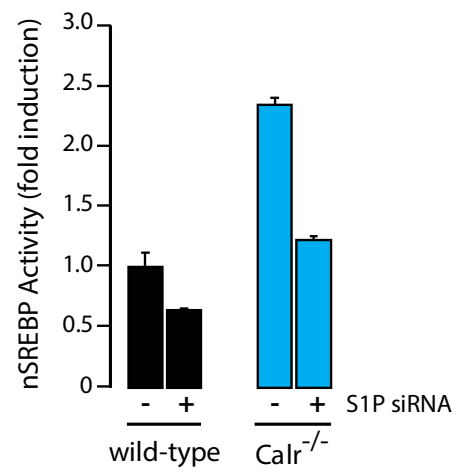

**Supplementary Figure S4.** Wild-type and *Calr*<sup>-/-</sup> cells were transfected with siRNA specific for S1P followed by nSREBP activity assay.

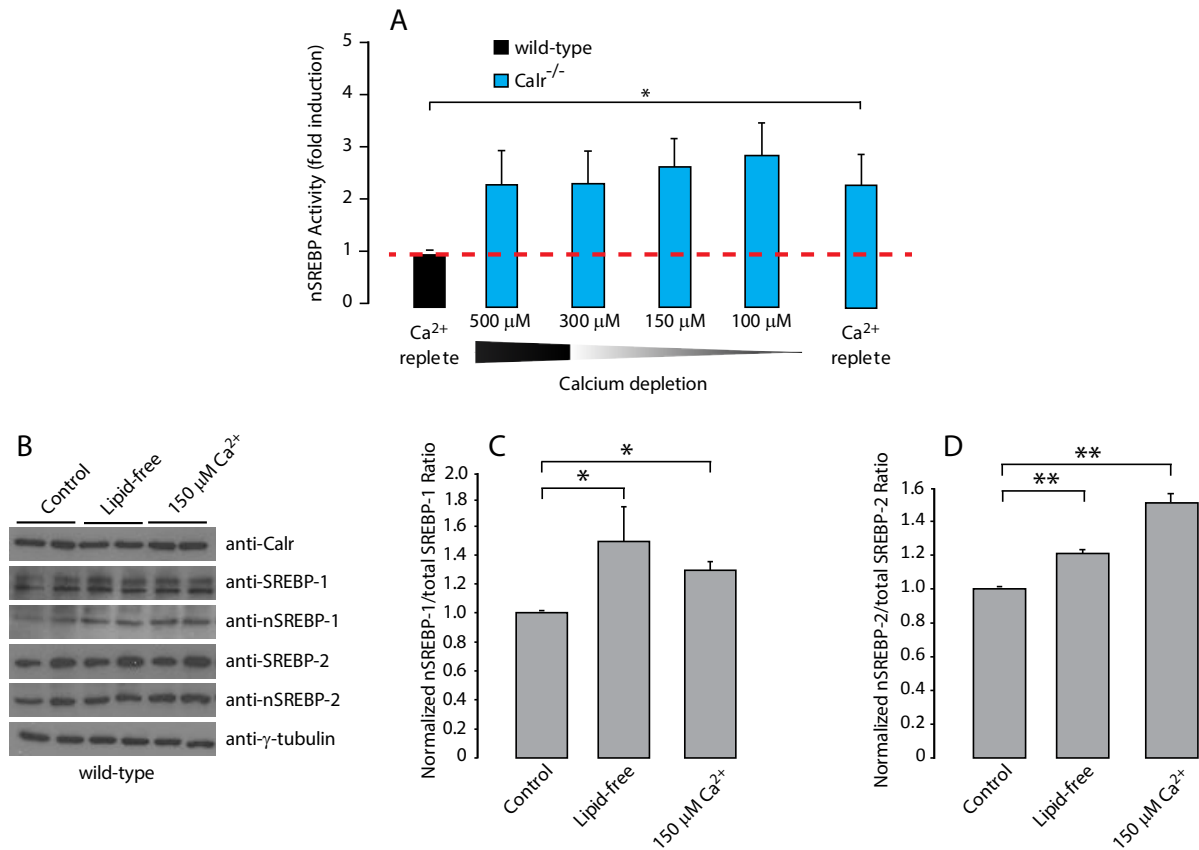

**Supplementary Figure S5. Ca<sup>2+</sup> effects on SREBP processing in *Calr*<sup>-/-</sup> cells.** **A.** nSREBP activity in *Calr*<sup>-/-</sup> cells exposed to decreasing extracellular Ca<sup>2+</sup> concentration as indicated in the Figure. Ca<sup>2+</sup> replete represents 2.17 mM extracellular Ca<sup>2+</sup> concentration. \*Indicates statistically significant differences, wild-type vs. *Calr*<sup>-/-</sup> cells in control conditions  $p$ -value=0.0235. Representative of 7 biological replicates. **B.** Representative immunoblot analysis of SREBP-1, nSREBP-1, SREBP-2 and nSREBP-2 protein in wild-type cells grown in cholesterol-free media or treated with 150 μM extracellular Ca<sup>2+</sup>. Anti-γ-tubulin antibodies were used as a loading control. Representative of 3 biological replicates. **C, D.** Quantitative analysis of Immunoblots, ratio of nuclear to total SREBP-1 (**C**) and total SREBP-2 (**D**). \*Indicates statistically significant differences, in **C**, for SREBP-1, control vs. cholesterol-free  $p$ -value=0.0432 and control vs. 150 μM Ca<sup>2+</sup>,  $p$ -value=0.0146. \*\*Indicates statistically significant differences, in **D**, for SREBP-2, control vs. cholesterol free,  $p$ -value=0.0012; control vs. 150 μM Ca<sup>2+</sup>,  $p$ -value=0.0013. Representative of 3 biological replicates. The images of (**B**) shown are cropped. The full-length gel/blots are shown in Fig. S17.

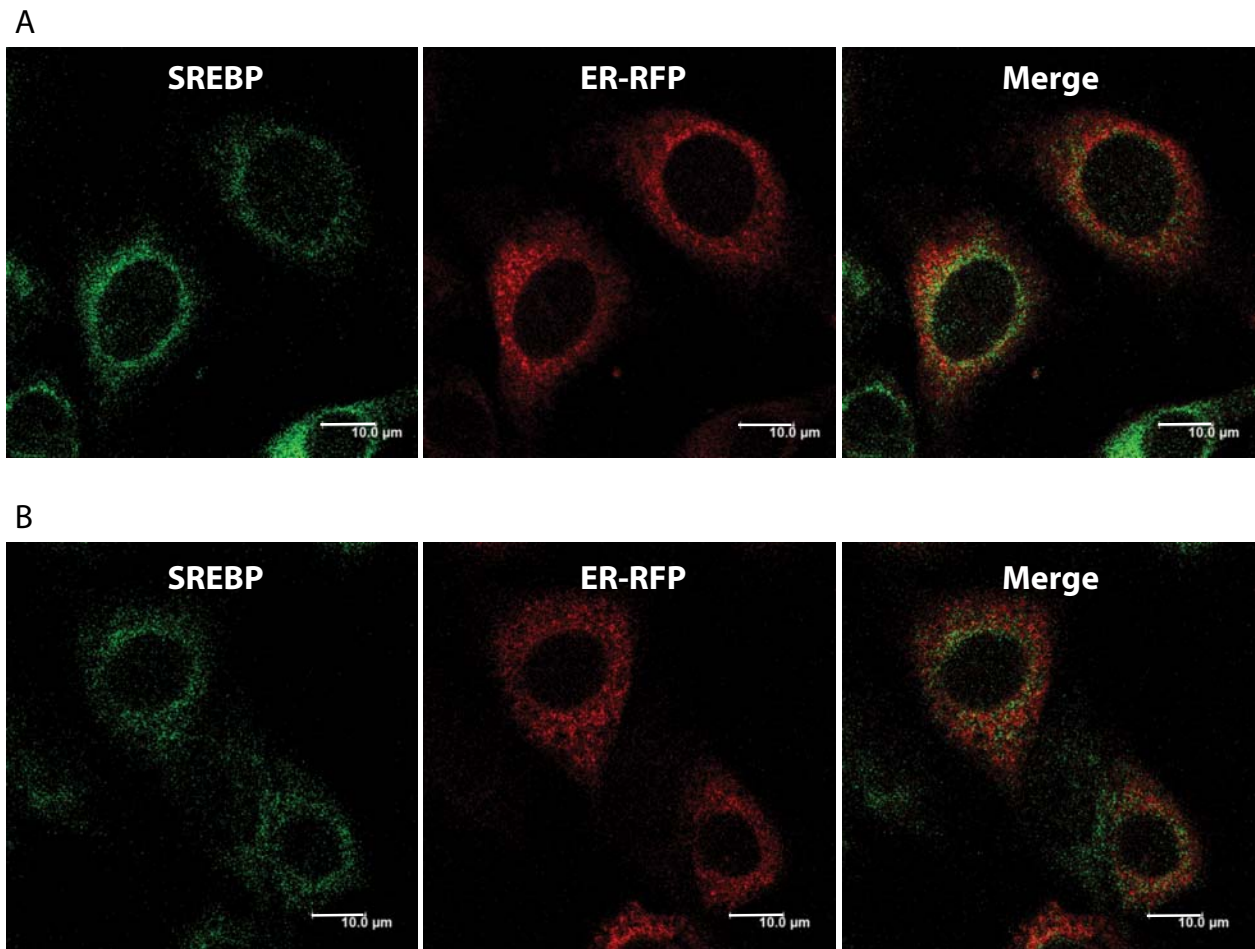

**Supplementary Figure S6. Cellular distribution of SREBP-2 in wild-type and *Calr*<sup>-/-</sup> cells.** Wild-type cells (A) and *Calr*<sup>-/-</sup> cells (B) expressing ER-targeted red fluorescent protein (ER-RFP) were stained with anti-SREBP antibodies. Wild-type cells Pearson's coefficient= $0.231 \pm 0.035$  (n=15); *Calr*<sup>-/-</sup> cells Pearson's coefficient= $0.291 \pm 0.038$  (n=15). Graphic representation of overlap SREBP and ER-RFP signals from representative cells is presented in the Figure. The arrows indicate the direction of the scan represented in the graph.

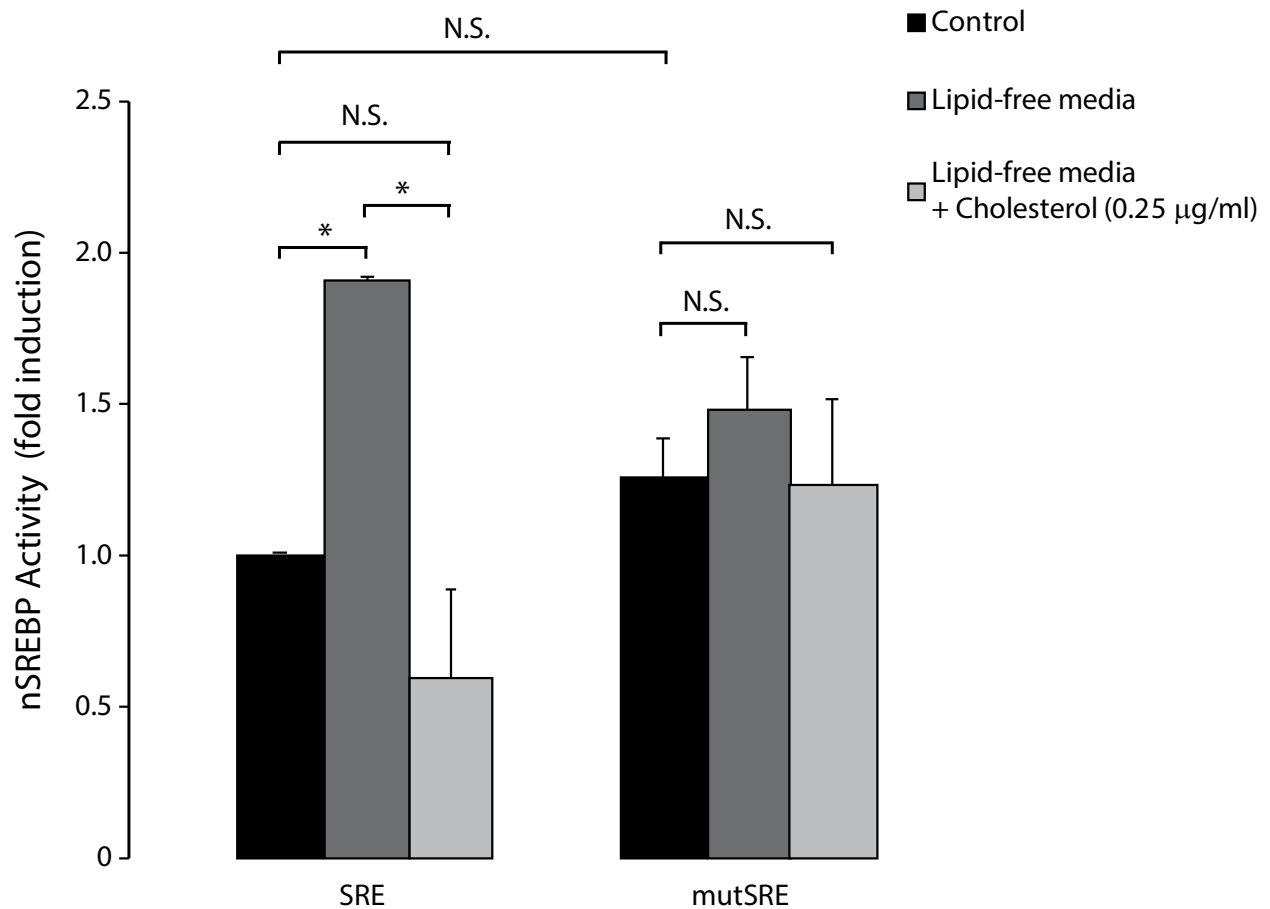

**Supplementary Figure S7. Mutational analysis of the SRE element in HeLa cells.** nSREBP activity in HeLa cells transfected with the SRE luciferase reporter plasmid or the mutated SRE (mutSRE) luciferase reporter plasmid treated with normal media, lipid-free media and lipid-free media plus cholesterol (0.25 µg/ml). SRE nucleotide sequence was mutated from ATCACCCAC to ATTACCACGC. \*Indicates statistically significant differences: HeLa cells with the SRE luciferase reporter in normal vs. lipid-free media,  $p$ -value<0.05 (ANOVA); HeLa cells with the SRE luciferase reporter in lipid-free media vs. lipid-free media plus cholesterol (0.25 µg/ml),  $p$ -value<0.05 (ANOVA). NS, not significant. Representative of 3 trials with 3 replicates.



**Anti-Calr**

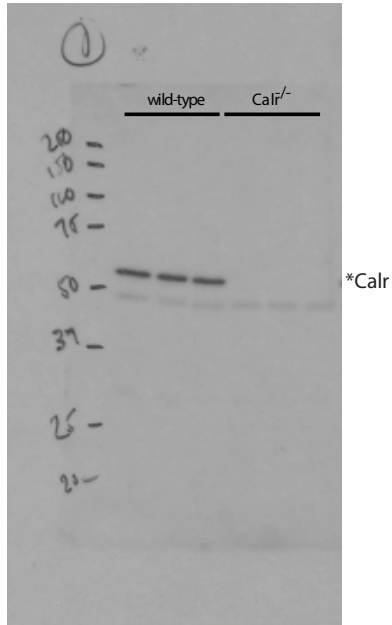

**Anti-SREBP-1**

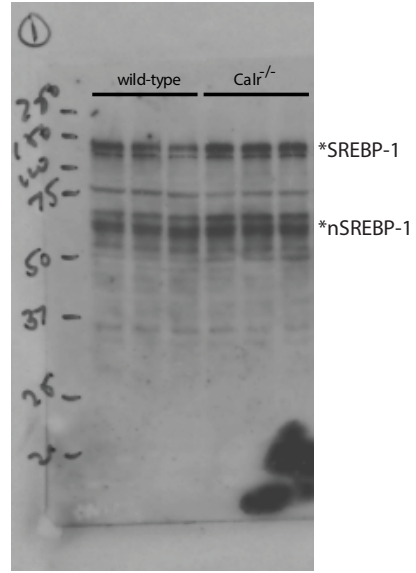

**Anti-SREBP-2**

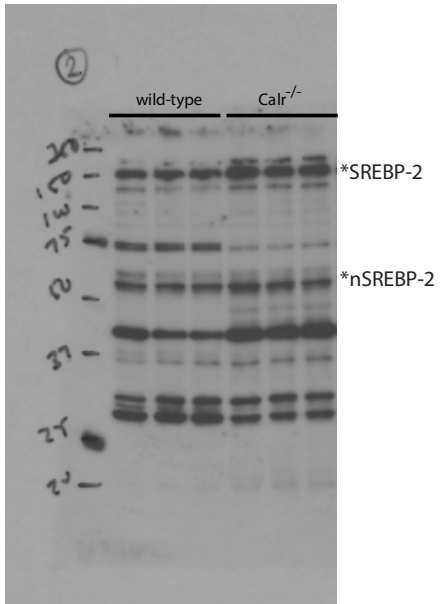

**Anti- $\gamma$ -tubulin**

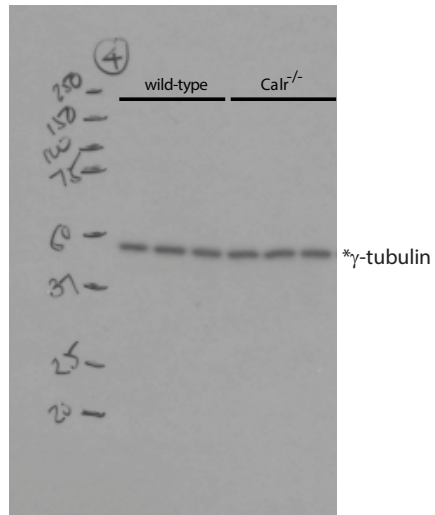

**Figure S8.** The full-length blots for Figure 2B

## Anti-Calr

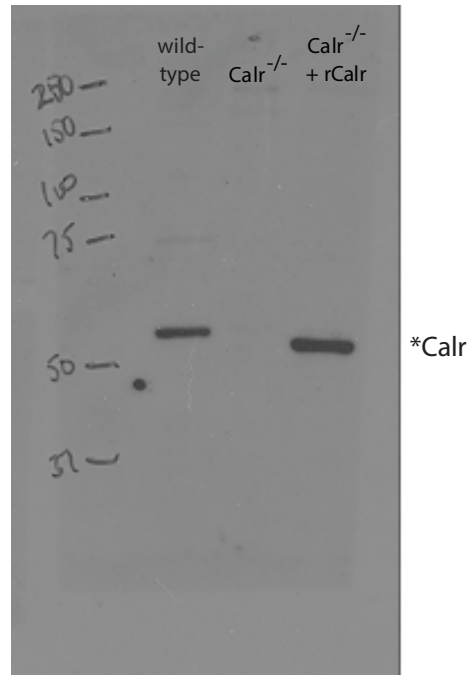

**Figure S9.** The full-length blots for Figure 2F

### Anti-Calr

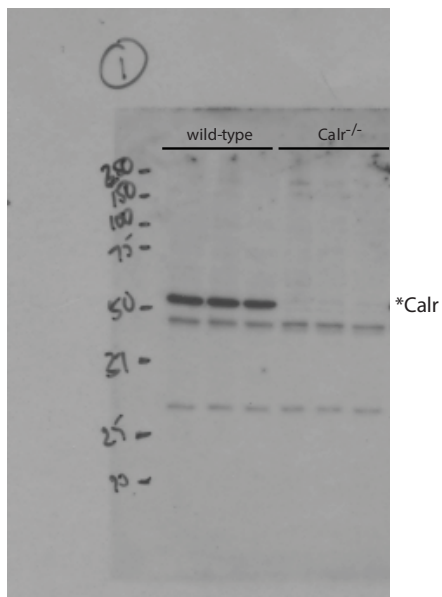

### Anti-SCAP

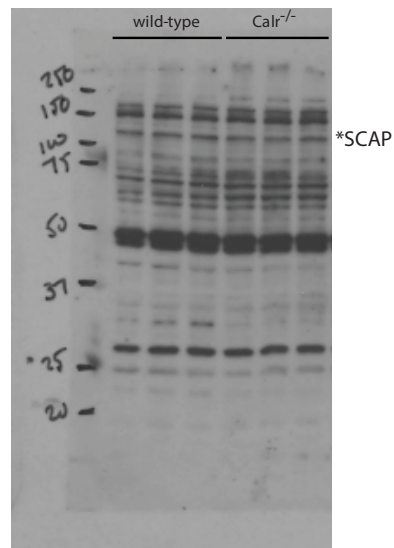

### Anti-INSIG

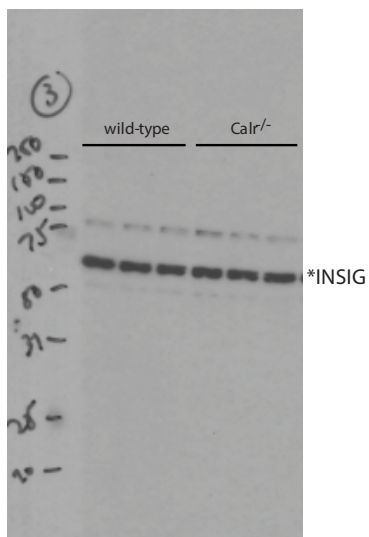

### Anti- $\gamma$ -tubulin

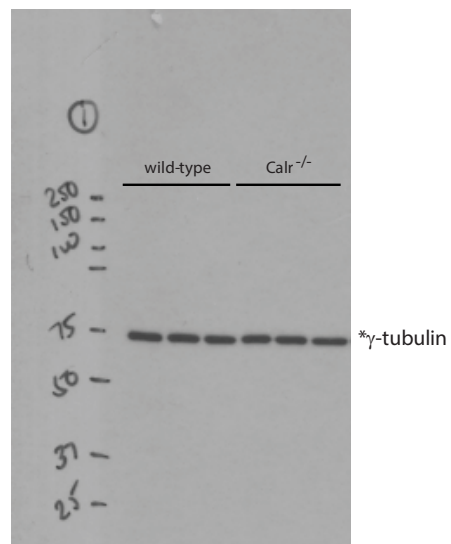

**Figure S10.** The full-length blots for Figure 3B

**Anti-INSIG**

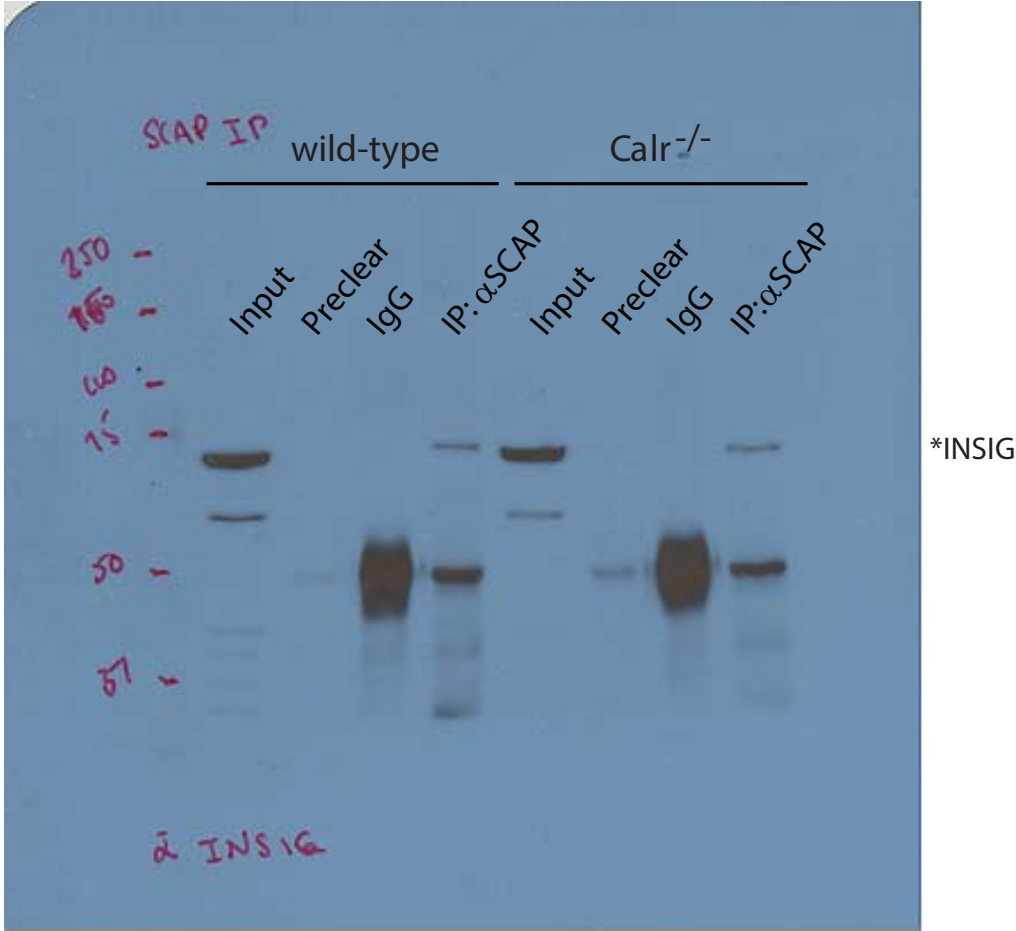

**Figure S11.** The full-length blot for Figure 3C

## Anti-SCAP

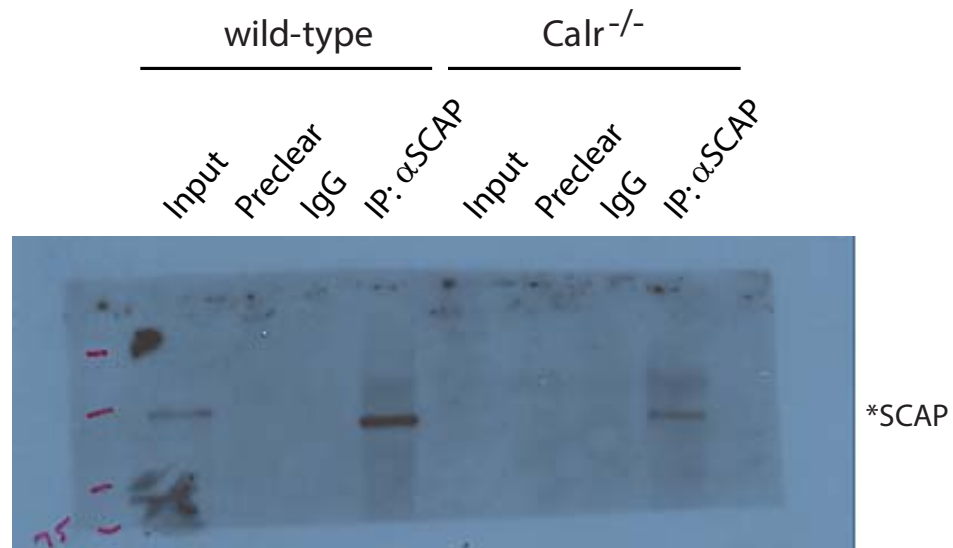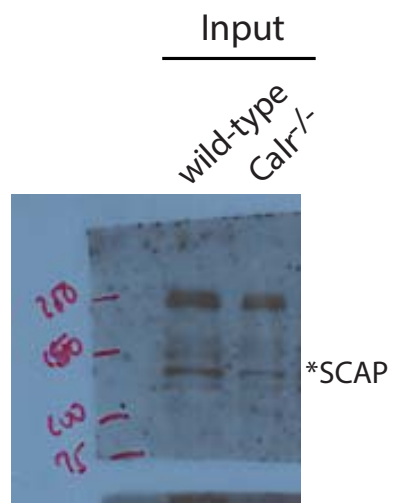

**Figure S12.** The full-length blots for Figure 3D

**Anti-SREBP-2**

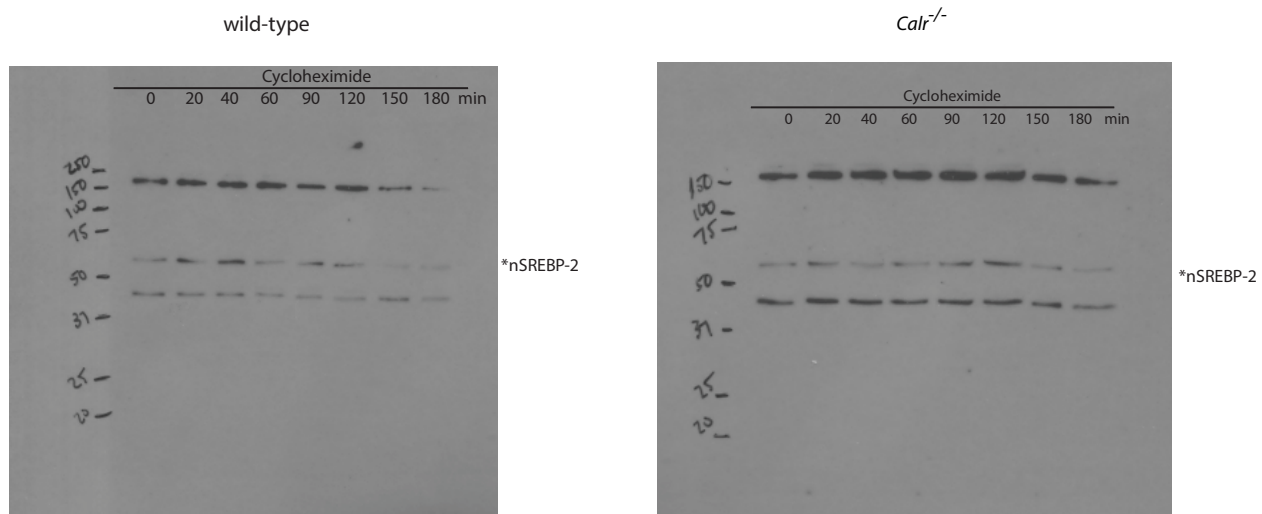

**Anti- $\gamma$ -tubulin**

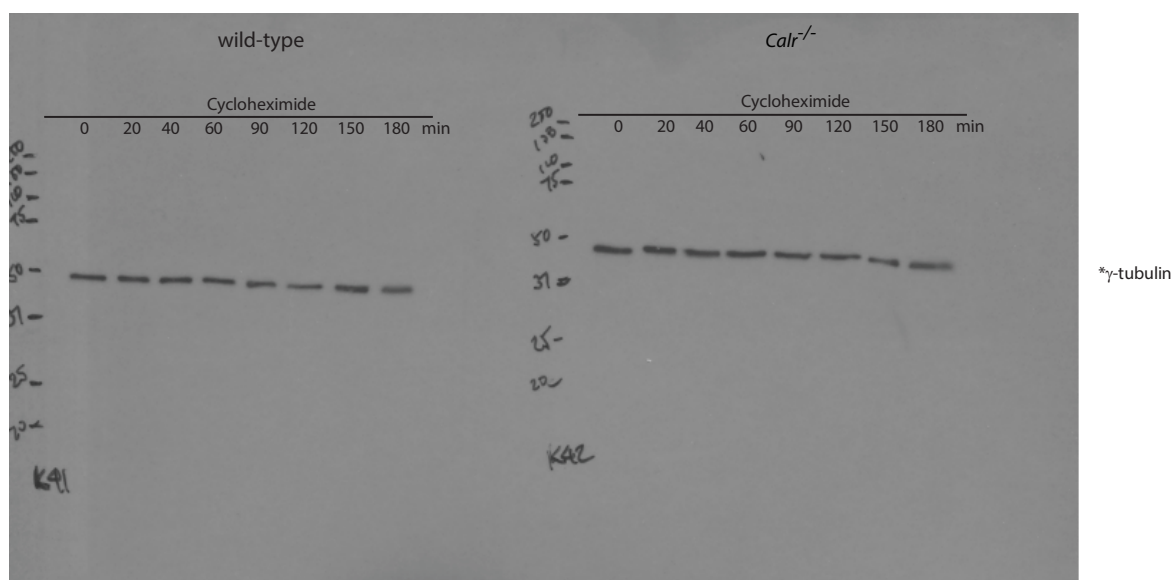

**Figure S13.** The full-length blots for Figure 3F

**Anti-ATF6**

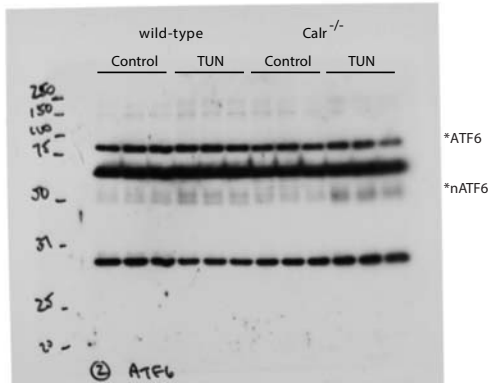

**Anti-Calr**

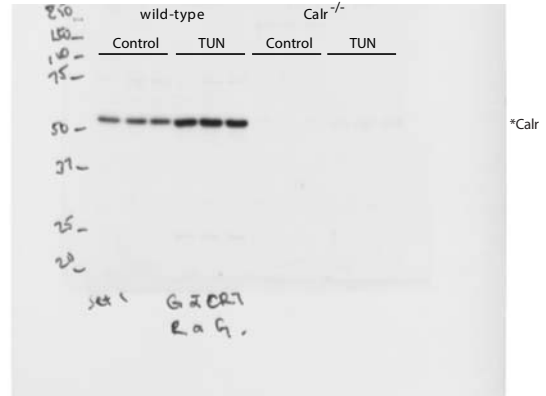

**Anti- $\gamma$ -tubulin**

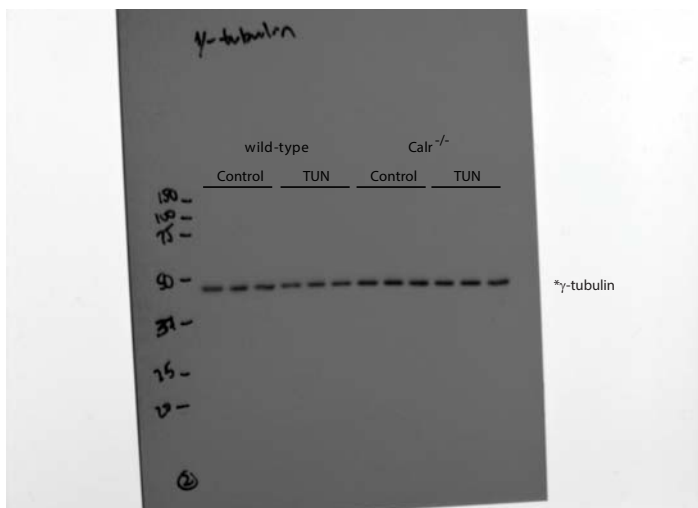

**Figure S14.** The full-length blots for Figure 4A

### Anti-Calnexin

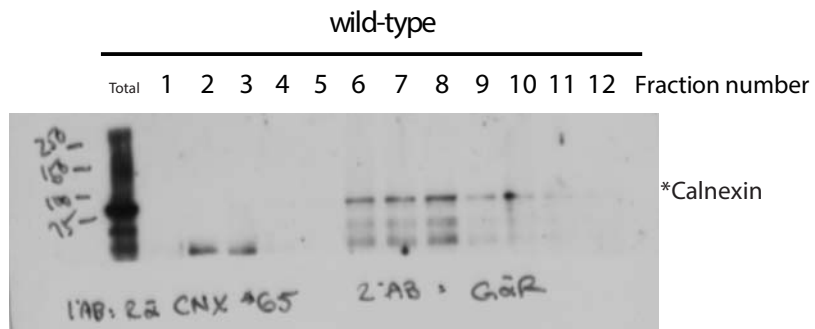

### Anti-GAPDH

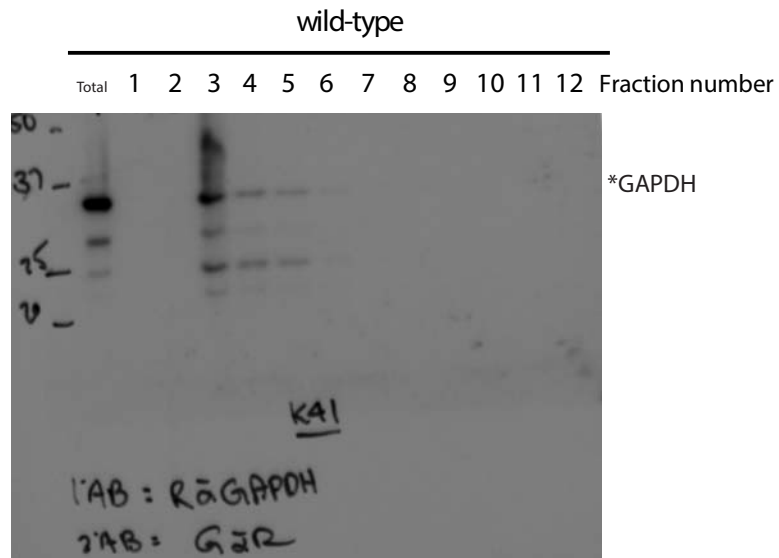

**Figure S15.** The full-length blots for Figure 7A



### Anti-Calnexin

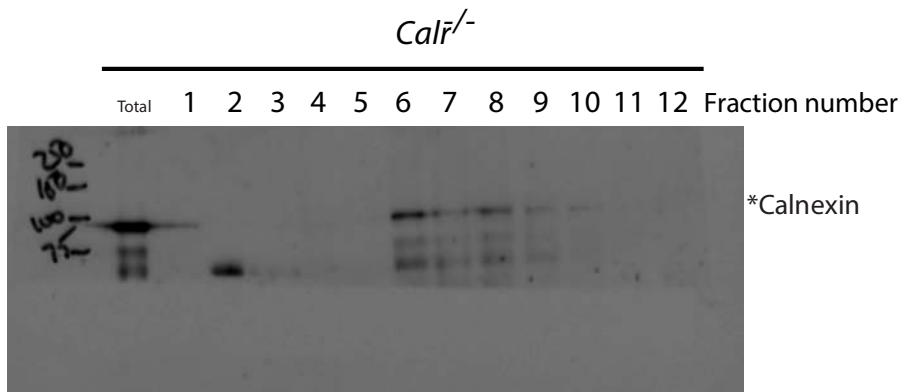

### Anti-GAPDH

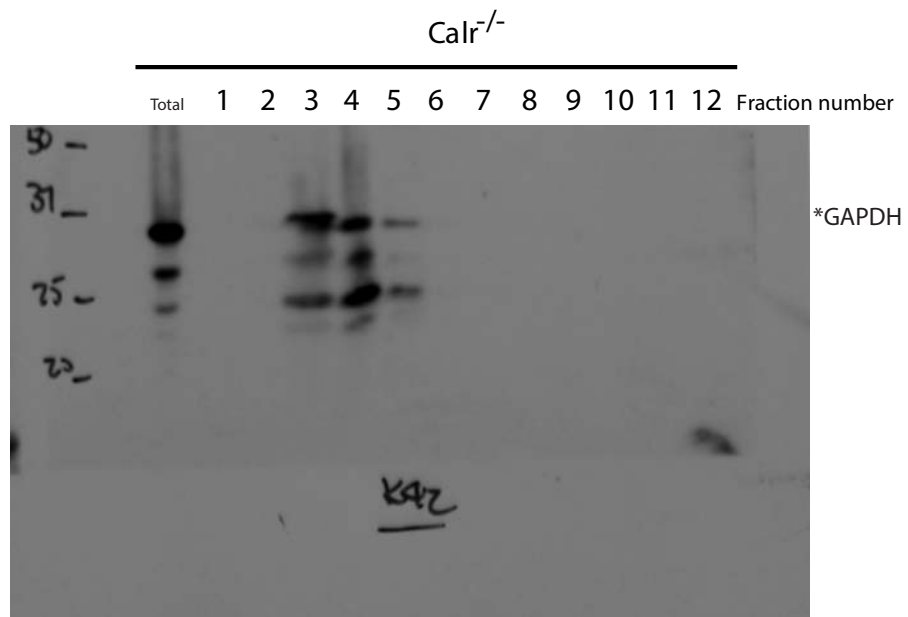

**Figure S16.** The full-length blots for Figure 7A

### Anti-Calr

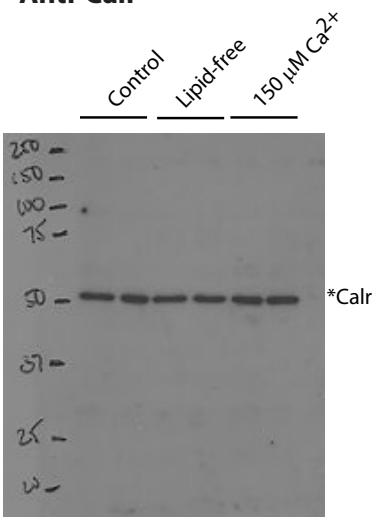

### Anti-SREBP-1

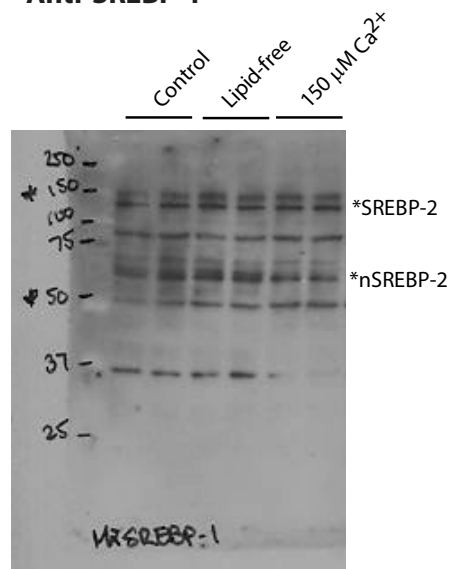

### Anti-SREBP-2

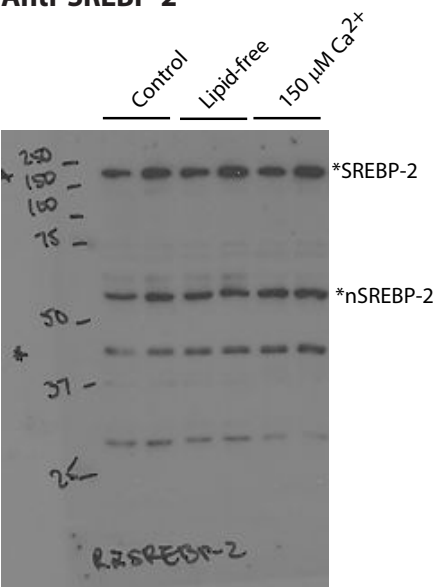

### Anti- $\gamma$ -tubulin

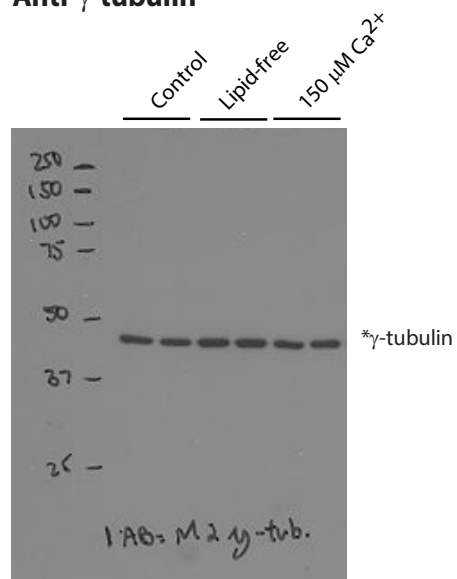

**Figure S17.** The full-length blots for Figure S5B
